# Supplementary material for: Characterization and genomic analysis of the Lyme disease spirochete bacteriophage ϕBB-1
Source: PubMed Central journal article supplement — bioRxiv. 2024 Jan 13:2024.01.08.574763. Preprint. [Version 2] doi: 10.1101/2024.01.08.574763 (PMC10802411; doi:10.1101/2024.01.08.574763), 2024-01-13
Supplement: NIHPP2024.01.08.574763v2-supplement-4.pdf [file NIHPP2024.01.08.574763v2-supplement-4.pdf]

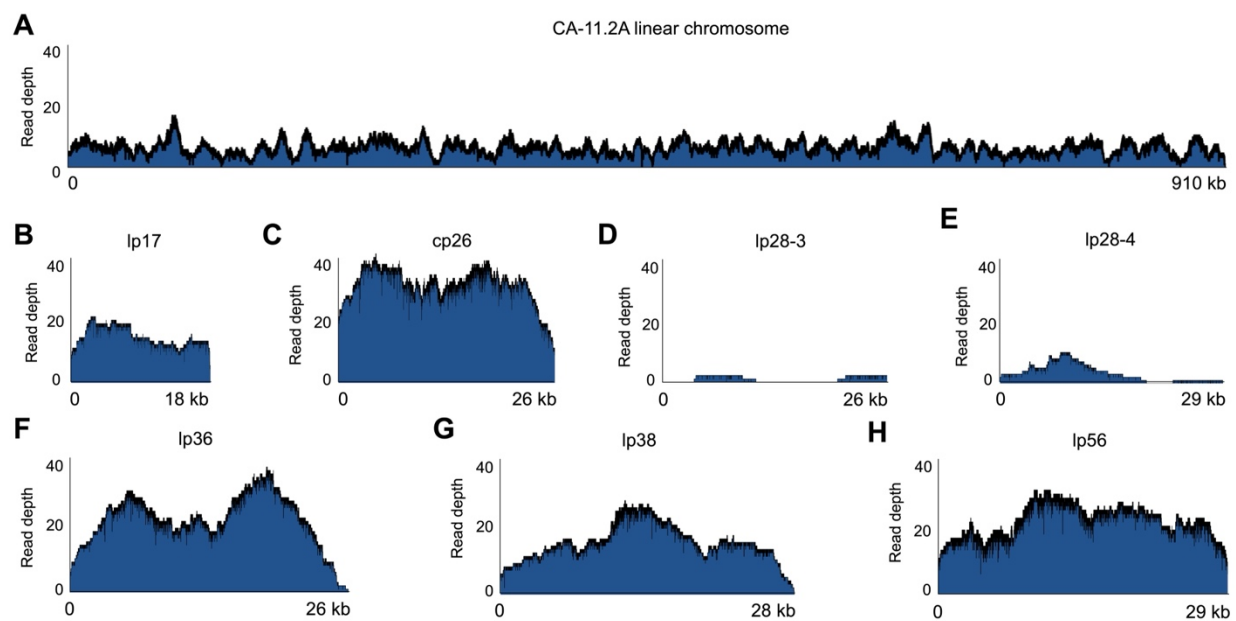

188

189 **Figure S1. Packaged read depth across the *de novo* CA-11.2A genome assembly.** *De novo* assembly  
190 of packaged reads >5kb produced the indicated contigs. Read coverage was then mapped to each contig.  
191 (A-H) Read coverage across the CA-11.2A chromosome or indicated plasmids are shown. Coverage maps  
192 for the cp32s and Ip54 are shown in Figures 6 and 9, respectively.

193

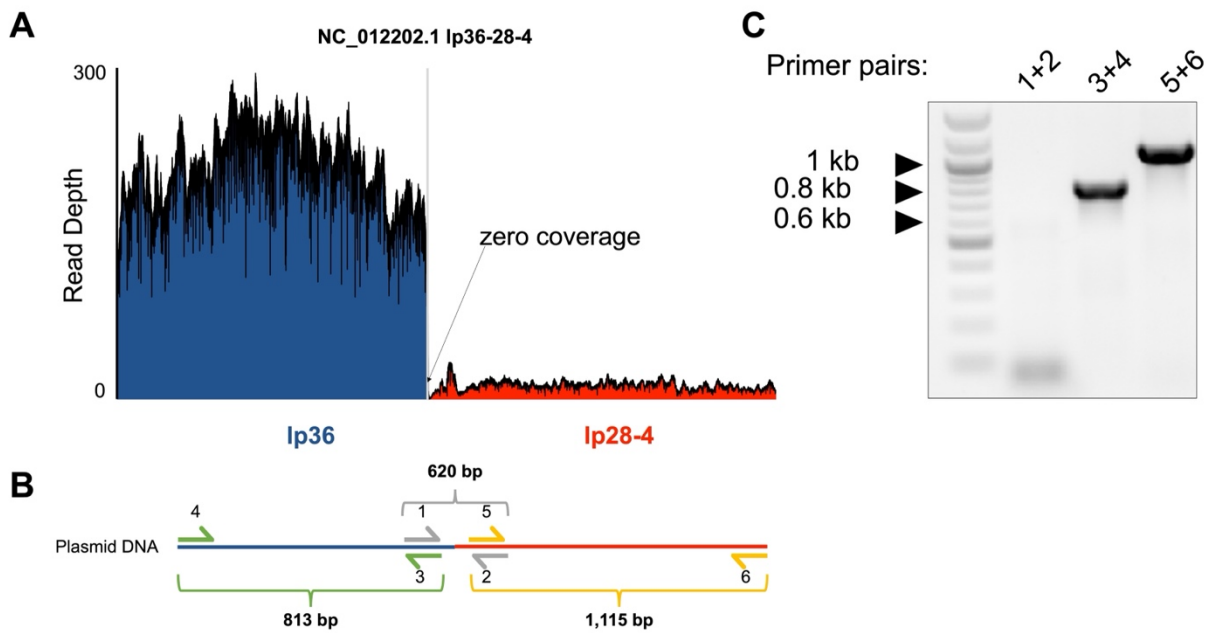

194

195 **Figure S2. Whole genome sequencing of the CA-11.2A genome reveals that plasmid lp36/lp28-4**  
196 **resolves into two separate episomes. (A)** The CA-11.2A genome was sequenced using long-read  
197 technology. Reads were aligned to the lp36/lp28-4 reference sequence (NC\_012202.1) and read depth  
198 plotted. **(B)** Schematic of PCR design. Primers 1 and 2 flank the lp36/lp28-4 junction, with primer 1  
199 annealing to lp36 and primer 2 annealing to lp28-4, creating a 620 bp product if joined. Primers 3 and 4  
200 anneal to lp36 DNA, creating an 813 bp product if present. Primers 5 and 6 anneal to lp28-4 DNA, creating  
201 a 1,115-bp product if present. **(C)** The presence or absence of lp36, lp28-4, or lp36/lp28-4 was confirmed  
202 by PCR.
